# Supplementary material for: Psychosocial Determinants of Tobacco Use among School Going Adolescents in Delhi, India
Source: J Addict. 2014 Nov 6;2014:170941. doi: 10.1155/2014/170941 (PMC4241244; doi:10.1155/2014/170941)
Supplement: Supplementary file 1 — General Self-efficacy of the study participants was assessed by Schwarzer's General Self-efficacy Scale (GSES). It contains 10 questions and scores were given on Likert scale. Psychosocial maladjustment was assessed by Pareek's Pre-adolescent Adjustment Scale (PAAS). It contains 40 questions in five different psychosocial domains, Home, School, Teachers, Peers and General. [file 170941.f1.pdf]

### Schwarzer's General Self-efficacy scale

(Never-1, Sometimes-2, Often-3, Always-4)

| S.NO | QUESTIONS                                                     | NEVER | SOMETIMES | OFTEN | ALWAYS |
|------|---------------------------------------------------------------|-------|-----------|-------|--------|
| 1    | I can manage difficult problems                               |       |           |       |        |
| 2    | If someone opposes me, I can find the ways to get what I want |       |           |       |        |
| 3    | I stick to my aims and goals                                  |       |           |       |        |
| 4    | I could deal effectively with unexpected events               |       |           |       |        |
| 5    | I know to handle unforeseen situations                        |       |           |       |        |
| 6    | I can solve most of my problems                               |       |           |       |        |
| 7    | I can rely on my coping abilities                             |       |           |       |        |
| 8    | I can find solutions for problems                             |       |           |       |        |
| 9    | If I am in trouble, I can usually think of a solution         |       |           |       |        |
| 10   | I can usually handle whatever comes my way                    |       |           |       |        |

### Pareek's Adolescent Adjustment Scale

| S.NO | QUESTIONS                                             | YES | NO |
|------|-------------------------------------------------------|-----|----|
| 1    | My parents get annoyed with me easily                 |     |    |
| 2    | The college is a burden for me                        |     |    |
| 3    | My neighbors are not good people                      |     |    |
| 4    | My parents give me full freedom to play               |     |    |
| 5    | My teacher encourages me in my studies                |     |    |
| 6    | I do not want to make friends                         |     |    |
| 7    | My friends do not allow me to do my work              |     |    |
| 8    | I don't get frightened in the presence of my teachers |     |    |
| 9    | The teachers take lot of work from us                 |     |    |
| 10   | I hesitate to speak before others in the class        |     |    |
| 11   | My friends in the college tease me                    |     |    |
| 12   | My teacher listens to me                              |     |    |
| 13   | My parents take care of my amusements                 |     |    |

|    |                                                           |  |  |
|----|-----------------------------------------------------------|--|--|
| 14 | I love my brothers and sisters at home                    |  |  |
| 15 | My parents interfere with my everyday activities          |  |  |
| 16 | I feel inferior to others                                 |  |  |
| 17 | I am very happy in the company of my friends              |  |  |
| 18 | I am not friendly with my companions                      |  |  |
| 19 | I want more holidays                                      |  |  |
| 20 | Very few friends help me                                  |  |  |
| 21 | I don't like my friends at all                            |  |  |
| 22 | I come to college daily                                   |  |  |
| 23 | I don't feel hesitant in asking questions to the teachers |  |  |
| 24 | We have got sufficient freedom in the class               |  |  |
| 25 | Everybody pays attention to whatever I say                |  |  |
| 26 | My teacher doesn't make me understand things              |  |  |
| 27 | I shall be happy if my teacher is transferred             |  |  |
| 28 | The rules of the college seems to be senseless to me      |  |  |
| 29 | I don't get angry easily                                  |  |  |
| 30 | I like my parents very much                               |  |  |
| 31 | My parents don't allow me to go out alone                 |  |  |
| 32 | Nobody in home understands my difficulties                |  |  |
| 33 | I like to study very much                                 |  |  |
| 34 | I don't have the habit of quarrelling with others         |  |  |
| 35 | I don't like frivolous jokes                              |  |  |
| 36 | Some of my friends are good                               |  |  |
| 37 | I can't express myself properly                           |  |  |
| 38 | I trust my friends                                        |  |  |
| 39 | I forget things in my teacher's presence                  |  |  |
| 40 | My teacher is very strict                                 |  |  |
